# Supplementary material for: In Situ Electrochemical Synthesis of Squamous-like Cu2S Induced by Sulfate-Reducing Bacteria as a Fenton-like Catalyst in Wastewater Treatment: Catalytic Performance and Mechanism
Source: MDPI journal article supplement (doi:10.3390/nano14070621), 2024-04-02
Supplement: s1 [file s1]

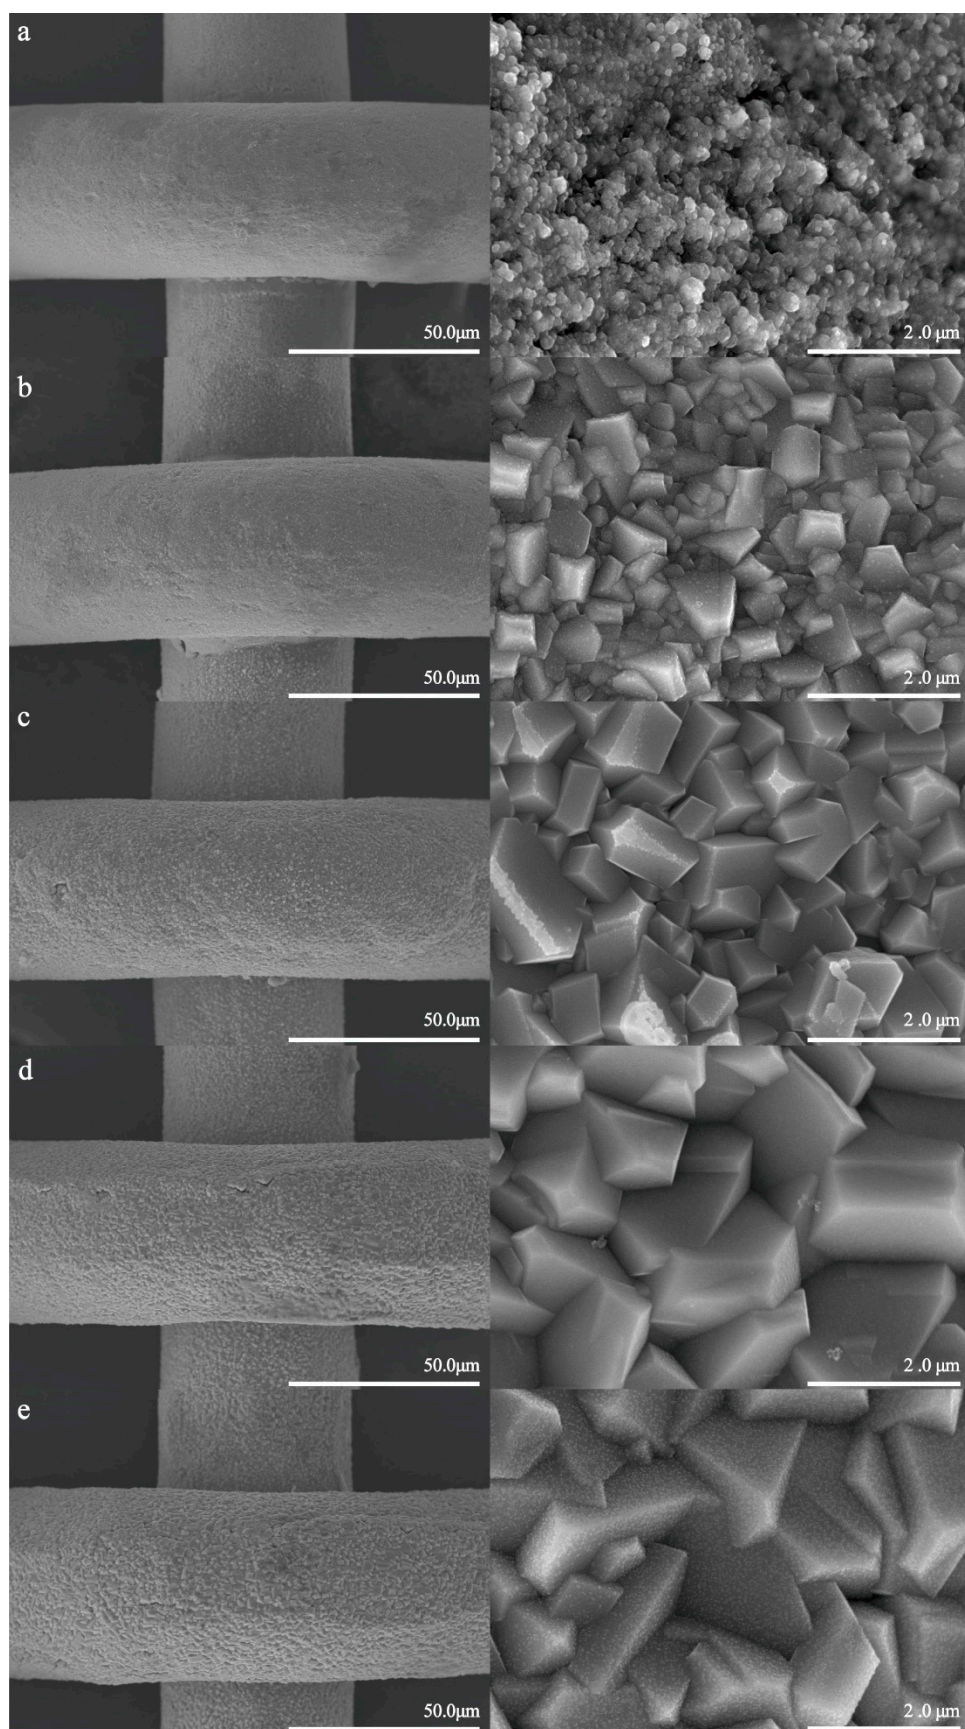

Figure S1. SEM of CSCM-SRB with same electrolytic time (900 s) and different current density: 0.25 mA/cm<sup>2</sup> (a); 1.25 mA/cm<sup>2</sup> (b); 2.5 mA/cm<sup>2</sup> (c); 3.75 mA/cm<sup>2</sup> (d); 5 mA/cm<sup>2</sup> (e)

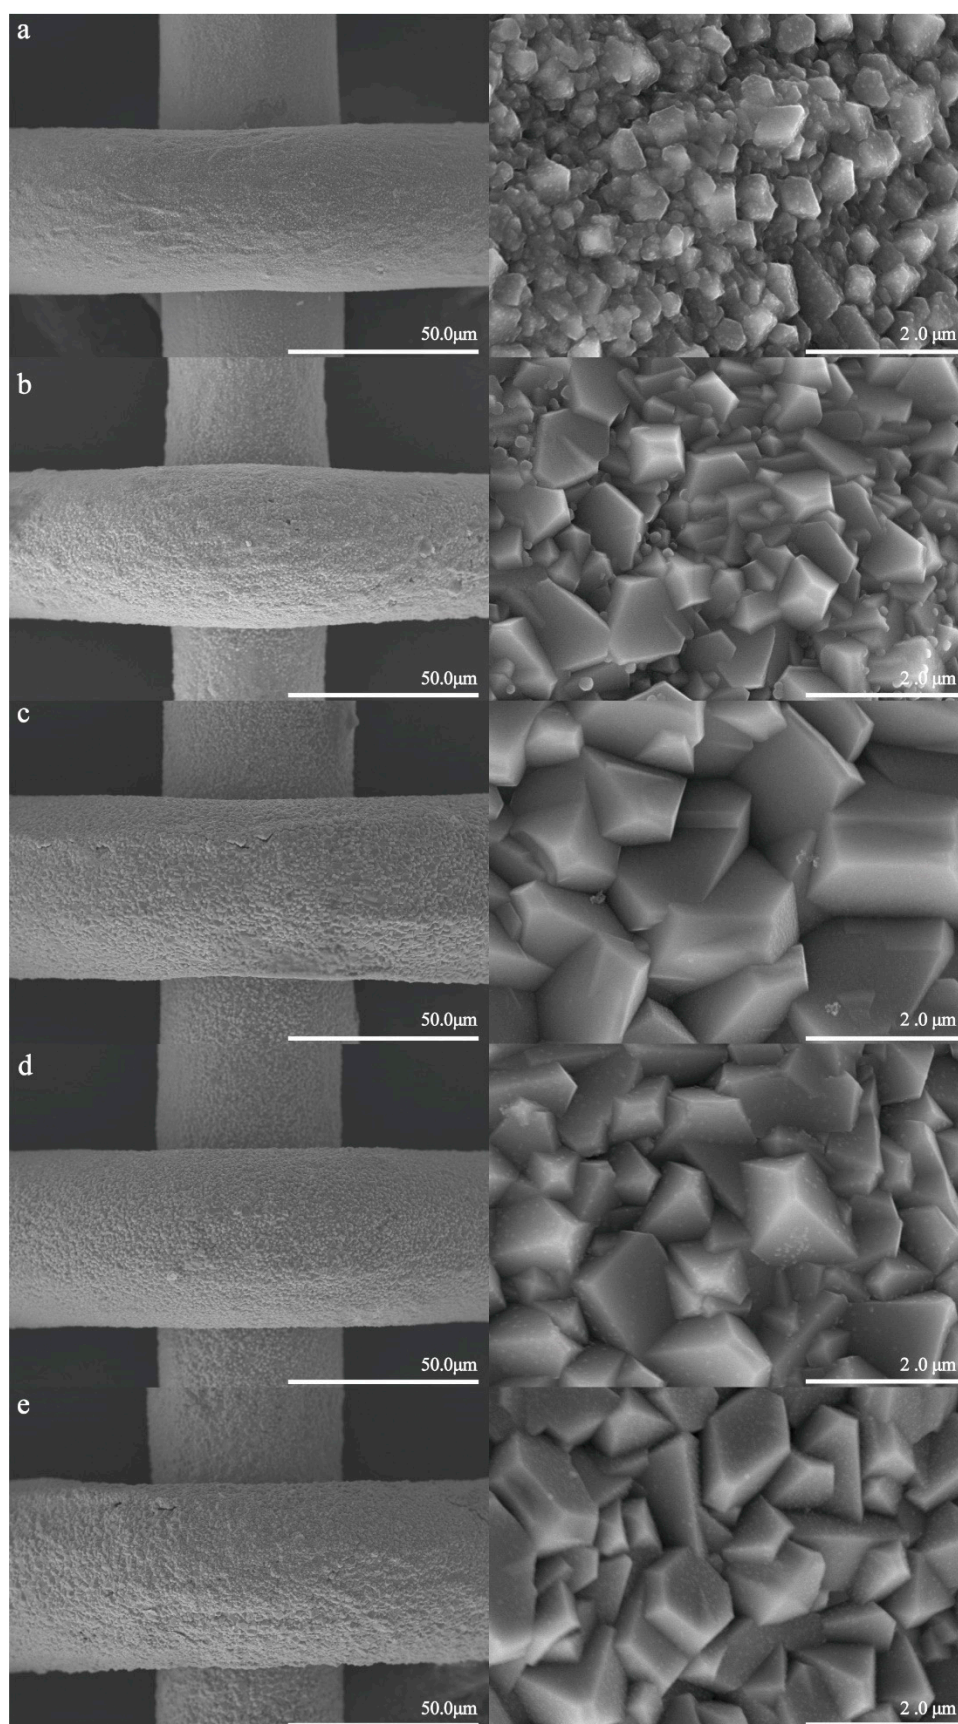

Figure S2. SEM of CSCM-SRB with same current density (3.75 mA/cm<sup>2</sup>) and different electrolytic time: 300 s (a); 600 s (b); 900 s (c); 1200 s (d); 1500 s (e)
